# Supplementary material for: Colloidal synthesis and characterization of monocrystalline apatite nanophosphors
Source: Royal Society of Chemistry journal article supplement (doi:10.1039/b701194f), 2007-01-01
Supplement: b701194f.pdf [file b701194f.pdf]

## Supporting information

### **A- FTIR assignments on reference samples**

FTIR spectra were recorded on the pure AEP, Ca-AEP and Ca-(AEP)<sub>2</sub> precipitates reference samples. The spectrum of pure Ca-(AEP)<sub>2</sub> which is the stable complex corresponding to the pH of our preparation route, exhibit three bands assigned to the PO<sub>4</sub> vibration at 982.7 cm<sup>-1</sup>, 1041 cm<sup>-1</sup> and 1099.3 cm<sup>-1</sup>. This latter band is close to the asymmetric P-O-C stretching vibration reported at 1050 cm<sup>-1</sup>. The region of 500 cm<sup>-1</sup> consisted of three bands at 485.4 cm<sup>-1</sup>, 516 cm<sup>-1</sup> and 560.4 cm<sup>-1</sup>. The bands at 741 cm<sup>-1</sup> can be attributed to the symmetric stretching of the P-O-C group. We can also observed the bands attributed to the symmetric (1533 cm<sup>-1</sup>) deformation of NH<sub>3</sub><sup>+</sup>. The band at 1455.6 cm<sup>-1</sup> is characteristic of the CH vibration.

FTIR spectra of pure calcium phosphate reference samples prepared without any incorporation of AEP were also recorded. The spectra display well defined typical vibrations of apatite mineral calcium phosphates over the region 500-700 cm<sup>-1</sup> suggesting that these samples prepared without AEP incorporation undergo some crystallisation.

**B- Table of  $^{31}\text{P}$ ,  $^1\text{H}$  Chemical shifts, line widths of reference samples.**

| Composition                           | $^{31}\text{P}$ Simple<br>impulsion             |                   | $^{31}\text{P}$ Cross<br>Polarisation |                   | $^1\text{H}$ RMN                                  |                   |
|---------------------------------------|-------------------------------------------------|-------------------|---------------------------------------|-------------------|---------------------------------------------------|-------------------|
|                                       | Chemical shift<br>ppm                           | Line width<br>ppm | Chemical shift<br>ppm                 | Line width<br>ppm | Chemical shift<br>ppm                             | Line width<br>ppm |
| AEP                                   | $\delta = 0.76$ 84%                             | 0.64              |                                       |                   |                                                   |                   |
|                                       | $\delta = 0.22$ 12%                             | 0.28              |                                       |                   |                                                   |                   |
|                                       | $\delta = -0.17$ 3%                             | 0.26              |                                       |                   |                                                   |                   |
|                                       | $\delta = -0.8$ 1%                              | 0.14              |                                       |                   |                                                   |                   |
| Ca-AEP                                | $\delta = 4.10$<br>$\delta = 1.84$              |                   | $\delta = 3.99$<br>$\delta = 1.77$    |                   | $\delta = 4.94$                                   |                   |
| Ca-(AEP) <sub>2</sub>                 | $\delta = -0.92$ (89%)<br>$\delta = 3.06$ (11%) | 0.57<br>1.96      | $\delta = -0.90$ (100%)               | 1.18              | $\delta = 9.41$<br>$\delta = 4.94$                |                   |
| Ca/AEP/Pm<br>3 / 0 / 0.25<br>non aged | $\delta = 2.86$                                 | 2.35              | $\delta = 3.07$                       |                   | $\delta = 4.9$<br>$\delta = 1.06$<br>$\delta = 0$ |                   |
| Ca/AEP/Pm<br>3 / 0 / 1.00<br>non aged | $\delta = 2.92$                                 | 1.96              | $\delta = 2.95$                       |                   | $\delta = 5.4$<br>$\delta = 0$                    | 5.00<br>0.57      |
| Ca/AEP/Pm<br>3 / 0 / 2.00<br>non aged | $\delta = 2.90$                                 | 1.99              | $\delta = 2.97$                       |                   | $\delta = 5.38$<br>$\delta = 0$                   | 5.11<br>0.6       |
